# Supplementary material
Source: PubMed Central journal article supplement (PMC6404099)
Supplement: mmc1.pdf [file mmc1.pdf]

## **Supplemental Information**

### **Protease-Activatable Adeno-Associated Virus**

#### **Vector for Gene Delivery to Damaged Heart Tissue**

**Caitlin M. Guenther, Mitchell J. Brun, Antonette D. Bennett, Michelle L. Ho, Weitong Chen, Banghe Zhu, Michael Lam, Momona Yamagami, Sunkuk Kwon, Nilakshee Bhattacharya, Duncan Sousa, Annicka C. Evans, Julie Voss, Eva M. Sevick-Muraca, Mavis Agbandje-McKenna, and Junghae Suh**

## SUPPLEMENTAL FIGURES

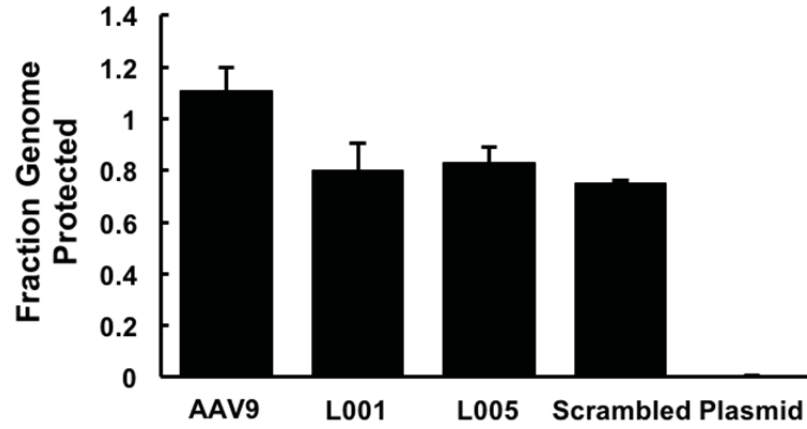

**Figure S1: Structural characterization of provectors.** Provectors display genome protection ability similar to AAV9. Vectors were incubated with benzonase nuclease and fraction of genomes protected was quantified with qPCR. Unprotected plasmid DNA served as control. Error bars: SEM, N=3.

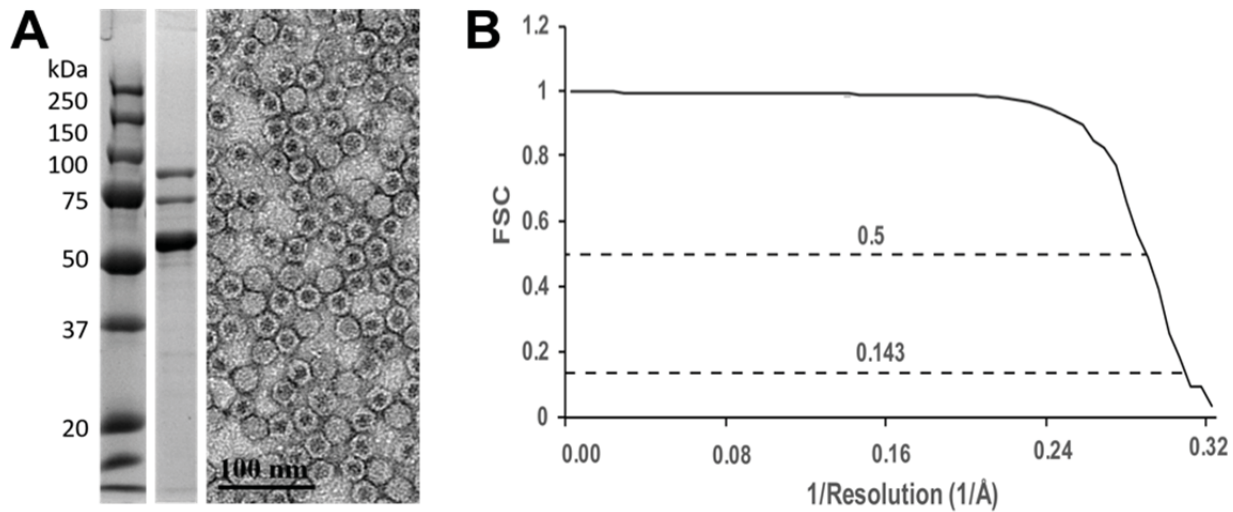

**Figure S2: Production and structure determination of L001.** (A) SDS PAGE (left) showing the molecular marker and the purified vector with VP1:VP2:VP3 in a 1:1:10 ratio and the negative stain EM (right) of purified vector. (B) To determine the resolution of the map, the Fourier Shell Correlation versus the inverse of the resolution from the last refinement cycle was plotted. The resolution for the map at FSC=0.143 is 3.16Å.

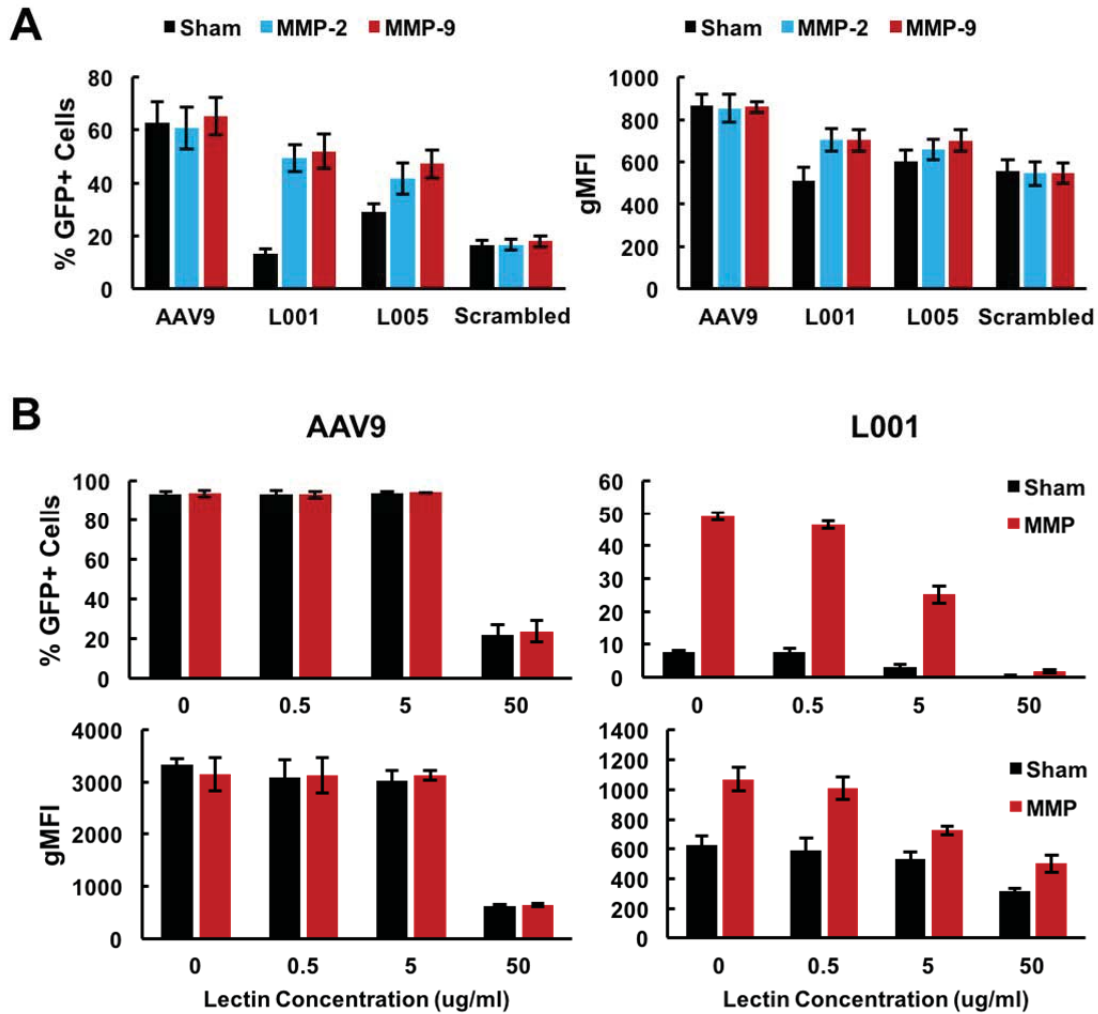

**Figure S3: Transduction data corresponding to transduction index (TI) calculation. (A)** % GFP+ cells (left) and geometric mean fluorescence intensity (right) quantified via flow cytometry used to calculate TI of Fig. 3B. Error bars: SEM, N=3. **(B)** % GFP+ cells (top) and geometric mean fluorescence intensity (bottom) quantified via flow cytometry used to calculate TI of Fig. 3C. Error bars: SEM, N=2.

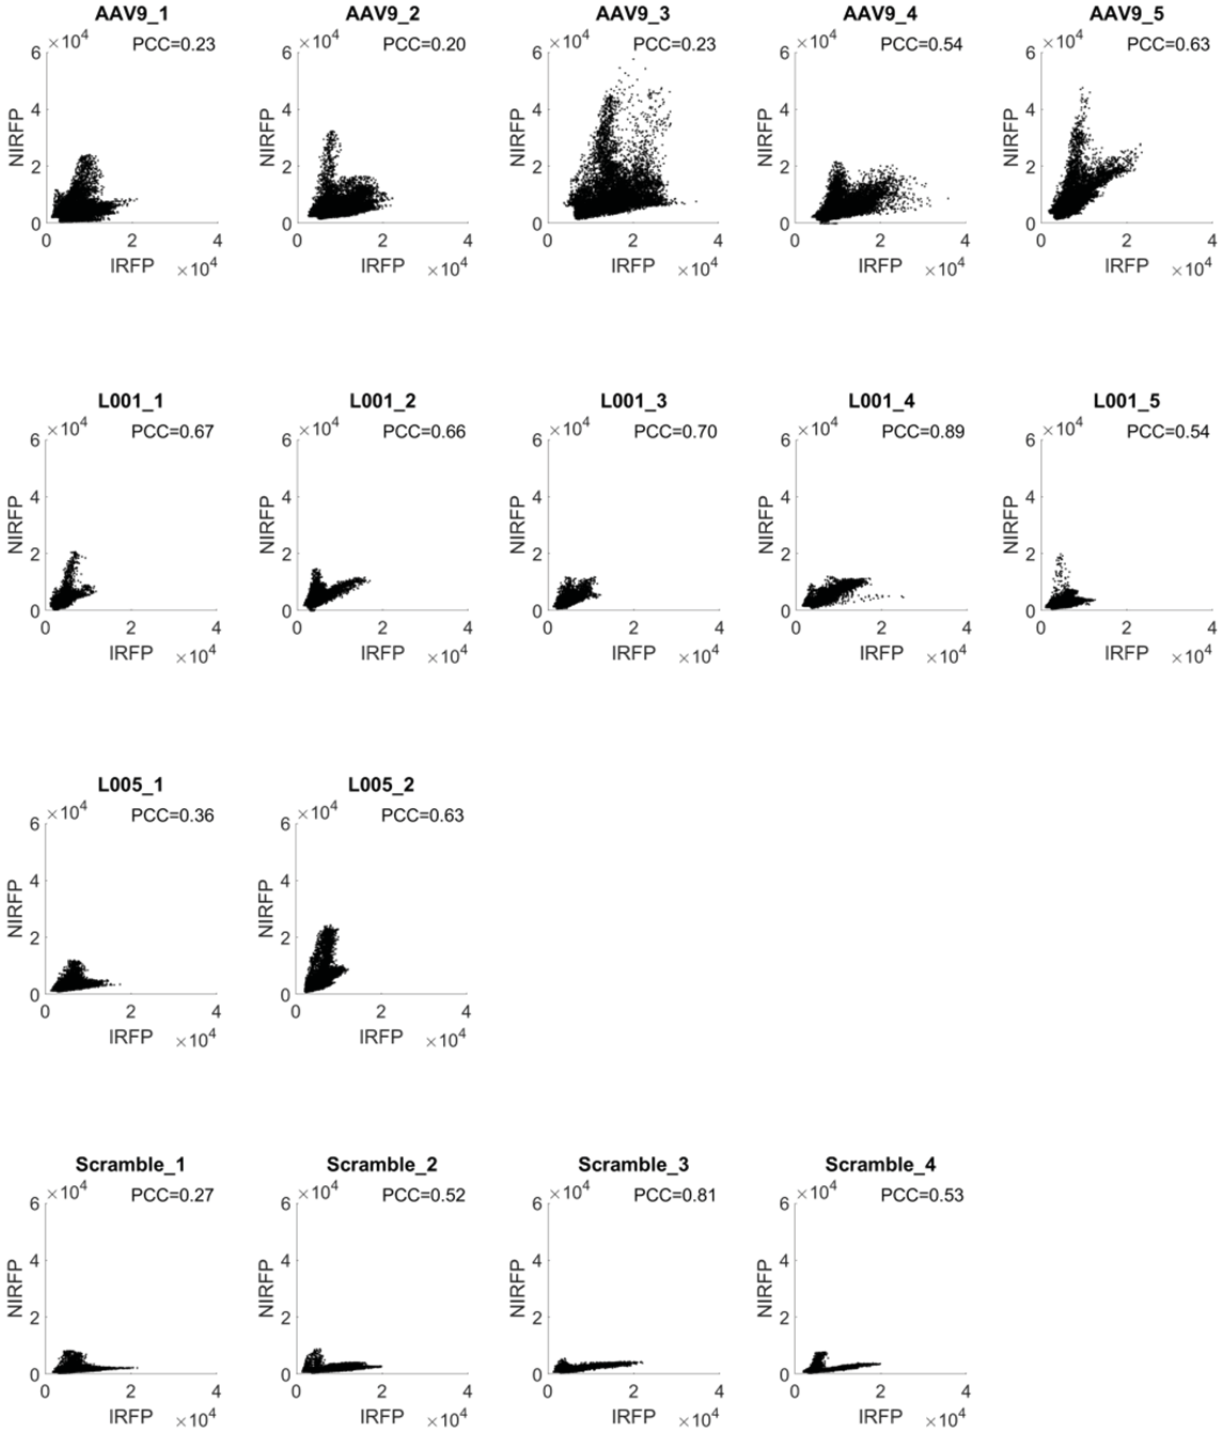

**Figure S4: Scatter plots of iRFP and NIRF pixel intensities of heart slices.** NIRF pixel intensities are plotted against IRFP pixel intensities to show the correlation between the two signals, and the resulting Pearson's Correlation Coefficient (PCC) is indicated. A higher correlation signifies a higher level of co-localization, indicating the specificity of the virus's ability to target tissue with elevated MMP expression.

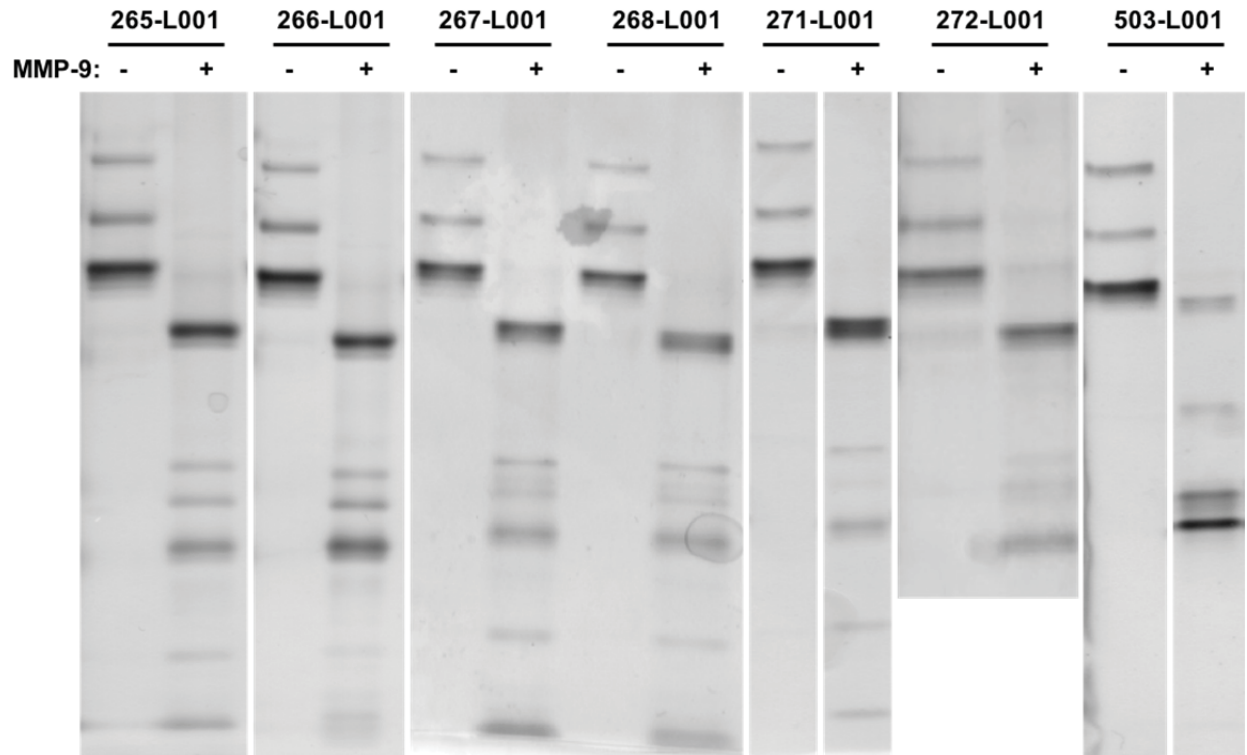

**Figure S5: Failed lock insertion site variants are susceptible to MMP cleavage.** Proteolytic cleavage fragments of the indicated variant capsid subunits can be detected via silver stain. Vectors were treated with MMP-9 or sham buffer. Intact VPs are observed in the sham conditions, while N-terminal and C-terminal fragments are observed for all variants following treatment with MMP-9.

## SUPPLEMENTAL TABLES

**Table S1: Lock insertion sites tested**

| Insert Location <sup>a</sup> | Titer <sup>b</sup> | MMP Cleavable <sup>c</sup> | Switchable Transduction <sup>d</sup> |
|------------------------------|--------------------|----------------------------|--------------------------------------|
| S265                         | +                  | Y                          | N                                    |
| G266                         | +                  | Y                          | N                                    |
| G267                         | +                  | Y                          | N                                    |
| S268                         | +                  | Y                          | N                                    |
| <b>D271</b>                  | +                  | Y                          | N                                    |
| <b>N272</b>                  | +                  | Y                          | N                                    |
| G453                         | ++                 | Y                          | Y                                    |
| S454                         | -                  | ND                         | ND                                   |
| <b>N470</b>                  | -                  | ND                         | ND                                   |
| A472                         | -                  | ND                         | ND                                   |
| V473                         | -                  | ND                         | ND                                   |
| <b>W503</b>                  | +                  | Y                          | N                                    |

<sup>a</sup> Locks inserted after indicated residue. Residues previously identified as being part of the galactose binding pocket are in bold.<sup>25</sup>

<sup>b</sup> Titer relative to WT AAV9: ++, within 1 log of AAV9; +, < 1 log of AAV9; -, < 2 log of AAV9, too low for further characterization.

<sup>c</sup> Capsid VP cleavage determined by visualization on silver stain.

<sup>d</sup> Tested on CHO-Lec2 cells at MOI of 5000. Y: Yes, N: No, ND: Not determined.

**Table S2: Summary of data collection parameters and refinement statistics**

| <b>Data Collection Parameters</b>              |                     |
|------------------------------------------------|---------------------|
| Total number of micrographs                    | 1444                |
| Defocus range ( $\mu\text{m}$ )                | 0.8-3.91            |
| Electron dose( $\text{e}^- / \text{\AA}^2$ )   | 59.40               |
| Frames / micrograph                            | 30                  |
| Pixel size ( $\text{\AA} / \text{pixel}$ )     | 0.974               |
| Starting number of particles                   | 145614              |
| Particles used for final map                   | 114044              |
| B-factor used for final map ( $\text{\AA}^2$ ) | 50                  |
| Resolution of final map ( $\text{\AA}$ )       | 3.16                |
| <b>PHENIX model Refinement Statistics</b>      |                     |
| Residue range                                  | 219-456 and 481-762 |
| Map CC                                         | 0.8477              |
| RMSD [bonds] ( $\text{\AA}$ )                  | 0.010               |
| RMSD [angles] ( $\text{\AA}$ )                 | 0.758               |
| All-atom clashscore                            | 0.88                |
| Ramachandran plot                              |                     |
| Favored (%)                                    | 95.53               |
| Allowed (%)                                    | 4.07                |
| Outliers (%)                                   | 0.00                |
| Rotamer outliers (%)                           | 0.00                |
| C- $\beta$ deviations                          | 0.00                |



**Table S3: Peptide lock oligo sequences**

| Lock Name | Oligo Name | DNA Sequence                                                                      | Peptide Lock Sequence              |
|-----------|------------|-----------------------------------------------------------------------------------|------------------------------------|
| L001      | L001 FW    | CCGGCGTGCCTATGAGTATGAGAGG<br>AGGAGGAGATGATGATGATGGAGTG<br>CCTATGAGTATGAGAGGCGGAGG | AG-VPMSMRGG-G-DDDD-G-VPMSMRGG-GA   |
|           | L001 RV    | GCGCCTCCGCCTCTCATACTCATAG<br>GCACTCCATCATCATCATCTCCTCCT<br>CCTCTCATACTCATAGGCACG  |                                    |
| L005      | L005 FW    | CCGGCCCTCTGGGACTCGCCAGAGG<br>TGATGATGACGACGGACCACTGGGA<br>CTGGCACGTG              | AG-PLGLAR-G-DDDD-G-PLGLAR-GA       |
|           | L005 RV    | GCGCCACGTGCCAGTCCCAGTGGTC<br>CGTCGTCATCACCTCTGGCGAG<br>TCCCAGAGGG                 |                                    |
| Scrambled | L001-S1 FW | CCGGCAGTATGGTGGGAATGAGACC<br>TGGAGGAGATGATGATGATGGAAGT<br>ATGGTGGGAATGAGACCTGGAG  | AG-SMVGM RPG-G-DDDD-G-SMVGM RPG-GA |
|           | L001-S1 RV | GCGCCTCCAGGTCTCATTCCCACCA<br>TACTTCCATCATCATCATCTCCTCCA<br>GGTCTCATTCCCACCATACTG  |                                    |

**Table S4: qPCR Primers**

| <b>Transgene</b> | <b>Primer Name</b> | <b>Sequence</b>        |
|------------------|--------------------|------------------------|
| CMV              | CMV FW             | TCACGGGGATTTCCAAGTCTC  |
|                  | CMV RV             | AATGGGGCGGAGTTGTTACGAC |
| iRFP             | iRFP3 FW           | AAGTGATCGCAGAGGATCGG   |
|                  | iRFP3 RV           | CACGGTTGAGGCAGGATAGT   |
| 18s              | 18s1 FW            | AACCCGTTGAACCCATT      |
|                  | 18s1 RV            | CCATCCAATCGGTAGTAGCG   |
